He exhibits the results of his investigations in the following equation

$$\text{pH} = 0.936 \text{ p}K_1 + 0.89 \log \frac{[\text{Alk}]}{[\text{CO}_2]}$$

in which  $\text{p}K_1$  is the negative logarithm of the first dissociation constant of carbonic acid (valid only for infinite dilution) and  $[\text{CO}_2]$  is the free carbonic acid in Mol/L, proportional to the  $\text{CO}_2$ -tension. Giving the constants a common value of 0.92 and introducing the Num. log the equation runs

$$H = \left( \frac{K_1 [\text{CO}_2]}{[\text{Alk}]} \right)^{0.92},$$

an equation which presents the results arrived at by KÄNDLER in their most summary form.

The deviation from the state of a pure Na-carbonate-bicarbonate solution is indicated in the first place by the exponential value of 0.92 instead of 1.00. The author has allotted this figure the value of a constant. There is, however, hardly any doubt that the difference 1.00—0.92 is to be ascribed to the effect of the neutral salts, or that, with declining salinity, the exponential value approaches unity. It is not yet known in accordance with what law this occurs.

It is most interesting to compare KÄNDLER's results with those obtained by others. In a work by BUCH — Rapp. et Proc. Verb. Vol. LXVII, 1930 — an experimental series with water at 27  $\frac{0}{100}$  gives on recalculation in the same way as KÄNDLER has done, the exponential value, 0.90, agreeing well with the latter's results; this fact shows the reliability of these two investigations, which were carried out quite independently of each other. These results are further confirmed by the experimental experience gained by H. WATTENBERG, of the German "Meteor" expedition. According to verbal information received from WATTENBERG, his experimental results at 18° agree exactly with those arrived at by BUCH. The whole question of the mutual relations of the carbonic acid factors is thus nearing at least an empirical solution, to which the author has made a valuable contribution. Various details in the observations are still difficult to account for, especially if one tries to fit them to the theory — difficulties which in part have already been remarked by earlier workers, — but which, however, are to some extent attributable to the inadequacy of the theory itself. One of the most important questions in this respect is that of the influence of the neutral salts, which leads us to the general problem of electrolytic dissociation of the strong electrolytes, which is still far from a solution.

KURT BUCH.

S. KEMP, A. C. HARDY and N. A. MACKINTOSH. Discovery Investigations, Objects, Equipment and Methods; Station List 1925—1927. Discovery Reports. Vol. I, pp. 1—232.

Mit einer bemerkenswerten Pünktlichkeit und in einem sehr ansprechendem Gewande beginnen die wissenschaftlichen Ergebnisse der »Discovery«

Expedition zu erscheinen, die in den Jahren 1925—1927 im Südatlantischen Ozean am Rande der Antarktis biologisch und ozeanographisch tätig war. In den beiden ersten Bänden veröffentlicht das Discovery-Committee zwei wertvolle Beiträge zur Frage der biologischen und ozeanographischen Beobachtungstechnik, die einen lehrreichen Einblick geben in die wissenschaftlichen Arbeitsmethoden der Expedition.

Im ersten Teil gibt der Expeditionsleiter, STANLEY KEMP, einen Überblick über die speziellen Forschungsaufgaben der Expedition. Im Mittelpunkt der Untersuchungen steht das Problem der Ökologie und Biologie der Wale, dessen Lösung im Hinblick auf die verheerenden Folgen des Walfanges in den anderen Fanggebieten der Erde auch vom ökonomischen Standpunkte aus als dringend geboten erscheint. Die Bearbeitung dieses Hauptproblems wurde von der Expedition auf mannigfaltige Weise in Angriff genommen: einerseits durch spezielle anatomische Untersuchungen der an den Walfangstationen in Grytviken (Südgeorgien) und in Saldanha-Bay (Kapland) eingebrachten Wale und andererseits durch hydrobiologische Untersuchungen in den von den Walen bevölkerten Meeresgebieten. Praktische Gründe zwangen die Expedition, zunächst von einer systematischen ozeanographischen und biologischen Erforschung des ganzen südlichen Meeresraumes durch engelegte Tiefsee-Stationen abzusehen und sich auf folgende Arbeiten zu beschränken: 1) eine eingehende hydrobiologische Aufnahme der küstennahen Gewässer rund um Südgeorgien, 2) vereinzelte Querprofile mit ozeanischen Stationen hauptsächlich zwischen den Falkland-Inseln, Südgeorgien, Südshetlands-Inseln und Kap Horn und 3) Markierungsexperimente zur Feststellung der Walwanderungen. Da sich für die letzte Aufgabe die »Discovery« als zu langsam erwies, wurde im August 1926 der neubaute Forschungsdampfer »William Scoresby« in den Dienst der Expedition gestellt.

Waren somit letzten Endes praktische Ziele für die Problemstellung und das Arbeitsprogramm massgebend, so wurden doch, wie ein Blick in die recht übersichtliche »Station List« und in die beigefügten Stationskarten lehrt, in umfangreicher Weise wissenschaftliche Untersuchungen an den einzelnen Stationen durchgeführt. Die Liste verzeichnet 299 Beobachtungsstationen der »Discovery« in der Zeit vom 16.XI.1925 bis 4.IX.1927 und 136 Stationen des »William Scoresby« in der Zeit vom 25.VIII.1926 bis 17.VI.1927. Bei der Mehrzahl dieser Stationen handelt es sich zwar um Untersuchungen (besonders Netzfänge) in den obersten Schichten des Ozeans. Hydrographische Reihenmessungen bis zu 1000 m Tiefe und darüber wurden an insgesamt rund 50 Stationen durchgeführt. Von besonderer Bedeutung für das Problem der ozeanischen Zirkulation ist ein Querprofil durch die Drake-Strasse mit 5 Tiefsee-Stationen, ein bis 1000 m (bezw. 1500 m) Tiefe reichender Schnitt von Südgeorgien zu den Falklandsinseln (mit 4 Stationen) und ein Schnitt Tristan da Cunha-Südgeorgien (mit 6 Stationen). Auf dem grossen Profil Falklandsinseln-Kapstadt, das in einem grossen nach N bis 33° S geschwungenen Bogen die Westwindzone quert, konnten wegen ungünstiger Wetterverhältnisse nur 8 tiefreichende Stationen durchgeführt werden. Die auf diesen Profilen ausgeführten Tiefseestationen sind im allgemeinen zu weitabständig, um für sich allein die Grundlage einer dynamischen Bearbeitung zu bilden, und es ist daher

dankbar zu begrüßen, dass die physikalisch-chemischen Beobachtungswerte *in extenso* in der »Station List« der wissenschaftlichen Welt für die Bearbeitung der verschiedenen schwebenden Probleme zugänglich gemacht werden. Kleine Teilgebiete hat die »Discovery«-Expedition in mehr systematischer Weise ozeanographisch erforscht, so die nähere Umgebung von Südgeorgien in 7 radial von der Insel ausstrahlenden Schnitten, ferner das Bransfield-Becken durch 2 Querprofile und schliesslich die Gewässer westl. Kapstadt durch eine ganze Anzahl von Stationen.

Im zweiten Teile geben STANLEY KEMP und A. C. HARDY eine eingehende Beschreibung der beiden Forschungsschiffe, ihrer wissenschaftlichen Ausrüstung und der auf ihnen angewandten Untersuchungsmethoden. Wir erhalten interessante nähere Mitteilungen über die Geschichte des Forschungsschiffes »Discovery« (65 m lang, 1300 t), das ursprünglich (1901—03) für die Polarforschung gebaut nach verschiedenartiger ruhmreicher Verwendung schliesslich vom »Discovery-Committee« erworben, gründlich repariert und umgebaut wurde. Als Vollschiff getakelt erwies sich die »Discovery« trotz ihrer polaren Qualitäten und trotz aller Umbauten schliesslich nicht besonders geeignet für ein ozeanographisches Forschungsschiff. So mussten z. B. wegen des Takelwerkes, insbesondere wegen des laufenden Guts, die ozeanographischen Beobachter aussenbords auf einer Plattform stehen, was bei Seegang auf dem stark rollenden Schiff die Untersuchungen sehr erschwerte. Auch befand sich die Hauptwinde für die biologische Arbeit hinter dem Hauptmast nicht in idealer Aufstellung. Für die ozeanographischen Arbeiten und die vertikalen Planktonfänge waren nicht weniger als 3 leichtere, mit Dampf betriebene Decksmaschinen auf Backbordseite aufgestellt, von denen 2 mit 6400 m Drahtlitze, die dritte mit 2 mal 900 m Litze (auf 2 Trommeln) bewickelt waren. In ausgiebiger Weise wurde bei der Führung der Instrumentenlitze von Gleitrollen, Zwischenrädern und Spannungsreglern (sogenannten Akkumulatoren) Gebrauch gemacht, wodurch einerseits sich der Betrieb der Maschinen etwas komplizierter gestaltete, andererseits aber die Zugbeanspruchungen der Haupttrommeln gemildert wurden. Von besonderem Interesse sind die Eigenschaften der in England hergestellten Drahtlitzen aus verzinktem Gusstahldraht, die auf der »Discovery« und auf der »William Scoresby« für die verschiedenen Zwecke Verwendung fanden. Zum Vergleich mit den auf anderen Expeditionen verwendeten Litzen seien hier die Werte (vom Referenten auf m und kg umgerechnet) wiedergegeben.

Eigenschaften der auf der »Discovery«-Expedition verwendeten Litzen und Trossen (aus verzinktem Gusstahldraht):

| Zweckbestimmung          | Oceanograph.                          | Leichte                 | Horizontal-<br>fänge | Grosse<br>Planktonnetze | Trawl- u.                   |
|--------------------------|---------------------------------------|-------------------------|----------------------|-------------------------|-----------------------------|
|                          | Serienmes-<br>sungen<br>Vertikalfänge | Plank-<br>ton-<br>netze |                      |                         | Dis- W. Sec<br>covery resby |
| Durchmesser (mm) . . .   | 4                                     | 6                       | 9—13                 | 12—14                   | 13 2                        |
| Umfang (mm) . . . . .    | 12                                    | 19                      | 28.5—41.3            | 38.1—44.5               | 41.3 63.                    |
| Anzahl Drähte . . . . .  | 6×7                                   | 6×7                     | 6×7, 6×12, 6×19      | 6×12, 6×17, 6×19        | 6×17 6×1                    |
| Bruchlast (kg) . . . . . | 1010                                  | 2310                    | 4570—10060           | 7420—11180              | 10060 2134                  |
| Gewicht pro 1000 m (kg)  | 55                                    | 128                     | 460 (Mittel)         | 594 (Mittel)            | 610 156                     |
| Benutzte Längen (m).     | { 910<br>16400                        | 25×220<br>6400}         | 6400                 | 9140                    | 1830 183                    |

Die Zugbeanspruchung der Drähte wurde bei stillstehender Trommel durch ein Salter Dynamometer kontrolliert. Als Lotmaschine wurde die bekannte Lukaslotmaschine verwendet, die mit Pianodraht von 0,7 mm Durchmesser bewickelt war. Bei stärkerem Seegang gestalteten sich die Drahtlotungen auf dem stark rollenden Schiff sehr schwierig. Schon aus diesem Grunde hätte sich der Einbau einer modernen Echolotanlage sehr gelohnt, ganz abgesehen von den reichen wissenschaftlichen Resultaten, welche ein ständiges Ablesen eines Echolotes (für grosse Tiefen) bezüglich der Morphologie des Meeresbodens in diesen wenig erforschten Gebieten gebracht hätten. Zwei Laboratorien, von deren zweckmässiger Einrichtung man durch Wort, Bilder und Pläne einen Begriff erhält, vervollständigen die Ausrüstung der »Discovery«.

Der Forschungsdampfer »William Scoresby« entspricht dem Typus eines modernen Walfangdampfers, verfügt über starke Maschinen (1050 PS) und hohe Geschwindigkeit (12 Sm), und ist wesentlich stärker gebaut als die »Discovery«. Seine wissenschaftliche Ausrüstung musste aus Raumgründen kleiner gehalten werden; sie bestand aus einer grossen Winde mit 3 Trommeln für Otter Trawl-Züge und Planktonuntersuchungen und 2 kleineren Decksmaschinen für die übrigen biologischen und ozeanographischen Arbeiten. Das Schiff besass ferner eine Echolotanlage für kleine Tiefen (im Maximum bis 230 m Tiefe verwendbar), die sich bei der praktischen Durchführung der Trawl- und Dredgezüge sehr bewährt hat. Auf grösseren Tiefen wurde gelegentlich mit der Lukaslotmaschine gelotet.

Den Hauptteil des Berichtes über die angewandten Apparate und Methoden bildet die Beschreibung der Planktonnetze und der zahlreichen Hilfsapparate für diese biologischen Arbeiten. Der Ozeanograph gewinnt aus diesem Berichte den Eindruck, dass die biologischen Apparate und Methoden durch die »Discovery«-Expedition zu einem hohen Stande der Beobachtungstechnik entwickelt wurden, und dass biologische Tiefseearbeiten vielfach weit grössere technische Schwierigkeiten bieten als physikalisch-ozeanographische. Es kamen nicht weniger als 6 verschiedene Netzgrössen für die vertikalen, schrägen und horizontalen Fänge zur Verwendung, das grösste von diesen besitzt die enorme Öffnung von  $4\frac{1}{2}$  m und ist wohl das grösste Horizontalnetz überhaupt. Von besonderem Interesse sind die zahlreichen neuartigen Hilfsmechanismen, die für die Auslösung der Schliessvorrichtungen der Planktonnetze verwendet wurden, ferner die stromlinienförmigen Beschwerungsgewichte und die Hilfsapparate zur indirekten Ermittlung der Beobachtungs- bzw. Schlepftiefen bei den horizontalen Netzfängen. Letztere wurden übrigens vielfach ersetzt durch »schräge« Netzfänge, die sich als ertragsreicher herausstellten. Die ozeanographischen Instrumente und Methoden der »Discovery«-Expedition entsprachen dem neuesten Stande der damals in der »Internationalen Meeresforschung« erprobten Beobachtungstechnik. Inzwischen haben die Erfahrungen der Deutschen Atlantischen Expedition auf »Meteor« 1925—27 eine Reihe von Modifikationen gebracht, welche die ozeanographischen Reihenmessungen mit grösserer Zeitökonomie und vielfach auch mit grösserer Exaktheit durchzuführen gestatten. Es sei hier beispielsweise der Verzicht auf Abfallgewichte bei den Drahtlotungen, die reichere Verwendung von Serienwasserschöpfern (nach dem Prinzip von NANSEN) und

die Einführung feinerer Kippthermometer bei den Serienmessungen erwähnt. Für künftige Arbeiten in diesen stürmischen Zonen, in denen meist ein Drahtwinkel auftritt, sei der Wunsch ausgesprochen, dass regelmässig jeder Beobachtungsreihe wenigstens 2 ungeschützte Kippthermometer zur thermometrischen Tiefenbestimmung mitgegeben werden, welche die wahre Beobachtungstiefe zu berechnen gestattet. Nach den Erfahrungen der »Meteor«-Expedition macht die Nichtberücksichtigung dieser Fehlerquelle die grosse Genauigkeit der Temperatur- und Salzgehaltsbestimmung (auf  $\frac{1}{100}$ ) vielfach illusorisch.

Den Schluss des Bandes bildet eine eingehende Beschreibung der von dem »Discovery-Committee« in Grytviken (Südgeorgien) errichteten Biologischen Station aus der Feder von W. A. MACKINTOSH, die allen an ein modernes hydrobiologisches Laboratorium zu stellenden Anforderungen entsprach.

Alles in allem werden die beiden ersten Lieferungen der »Discovery«-Reports, die eine Fülle praktischer, vielfach unter schwierigen Verhältnissen gewonnenen Erfahrungen enthalten, von allen Ozeanographen dankbar begrüsst werden und in ihnen den Wunsch erwecken, dass diese bedeutungsvollen Forschungen fortgesetzt und weiter nach S auf die eigentliche Antarktis ausgedehnt werden. Hier kann durch systematische Reihenmessungen entscheidendes Beobachtungsmaterial für die Frage der Entstehung des antarktischen Bodenwassers gewonnen und damit bis zur primären Kraftquelle der stratosphärischen Zirkulation vorgedrungen werden; hier lassen auch ständige Echolotungen reiche neue Aufschlüsse über die Morphologie des Südpolarbeckens erwarten. In vorbildlicher Weise lehren die bisher von der »Discovery«-Expedition durchgeführten Arbeiten, dass es bei der Verfolgung des Walproblems möglich ist, praktische Ziele mit rein wissenschaftlichen Forschungen zu vereinigen.

GEORG WÜST.

M. NICLOUX. Le dosage de l'oxygène dissous dans l'eau de mer. Bull. de l'Inst. Océanog. No. 563. Monaco, 1930.

In order to estimate the dissolved oxygen in small samples of water — 5 to 40 c.c. — a special reaction vessel was used, in place of the usual glass stoppered bottle. This has the form of an inverted Y and contains a glass ball which can be rolled from one arm to the other to ensure complete mixing. It is filled with the water of which it is desired to determine the dissolved oxygen content: alkaline iodide solution is run into one arm and a solution of manganous sulphate or chloride into the other, by means of fine pipettes; a rubber stopper carrying a semicapillary tube is then inserted as far as a mark on the glass. The contents are mixed by rolling the glass ball backwards and forwards from one arm to the other, and the resulting manganese hydroxides dissolved by adding a small quantity of phosphoric acid through the tube in the stopper. The heavy acid runs down the fine bore tube, which was full of water. The stopper is then withdrawn and the contents poured into a beaker or flask for titration of the iodine set free. A microburette with N/100 or N/200 sodium thiosulphate solution was used, with starch solution as indicator.
